# Supplementary material
Source: PubMed Central journal article supplement (PMC1635371)

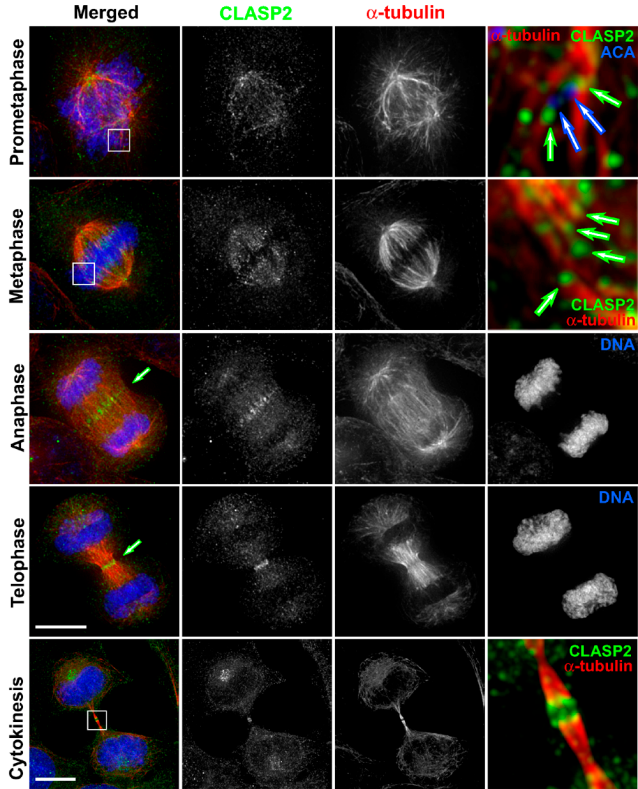

Supplementary Figure S1 - Pereira et al., 2006

Supplement: mbc_E06-07-0579_1.pdf [file mbc_E06-07-0579_1.pdf]

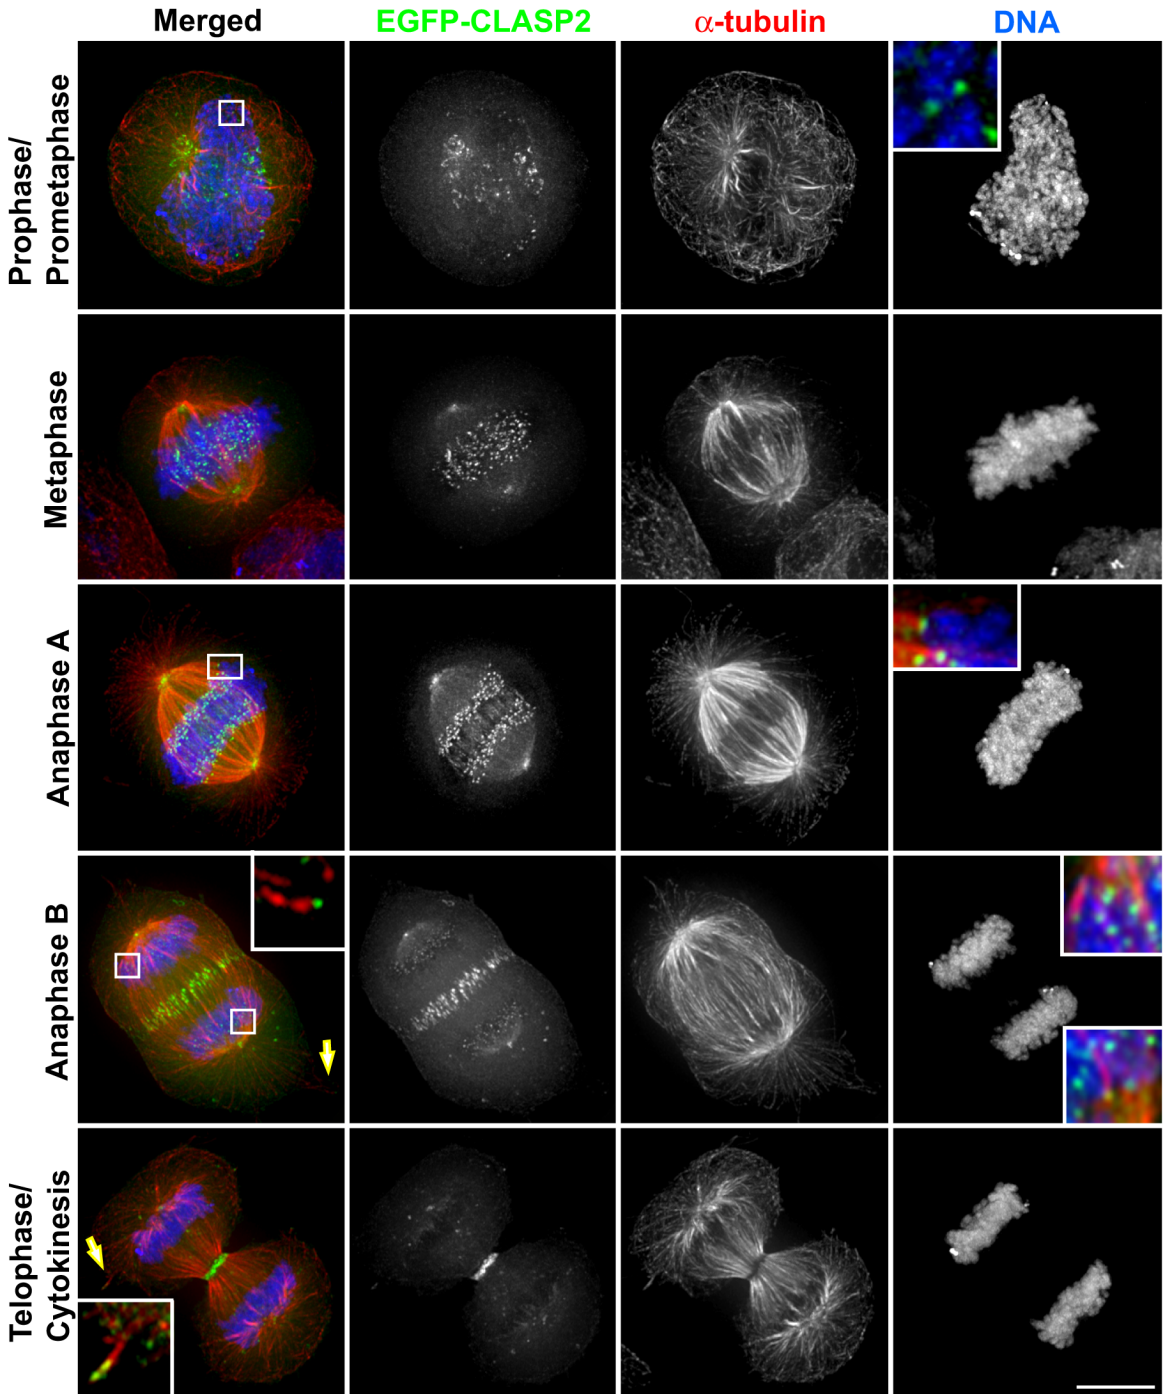

Supplementary Figure S2 - Pereira et al., 2006

Supplement: mbc_E06-07-0579_2.pdf [file mbc_E06-07-0579_2.pdf]

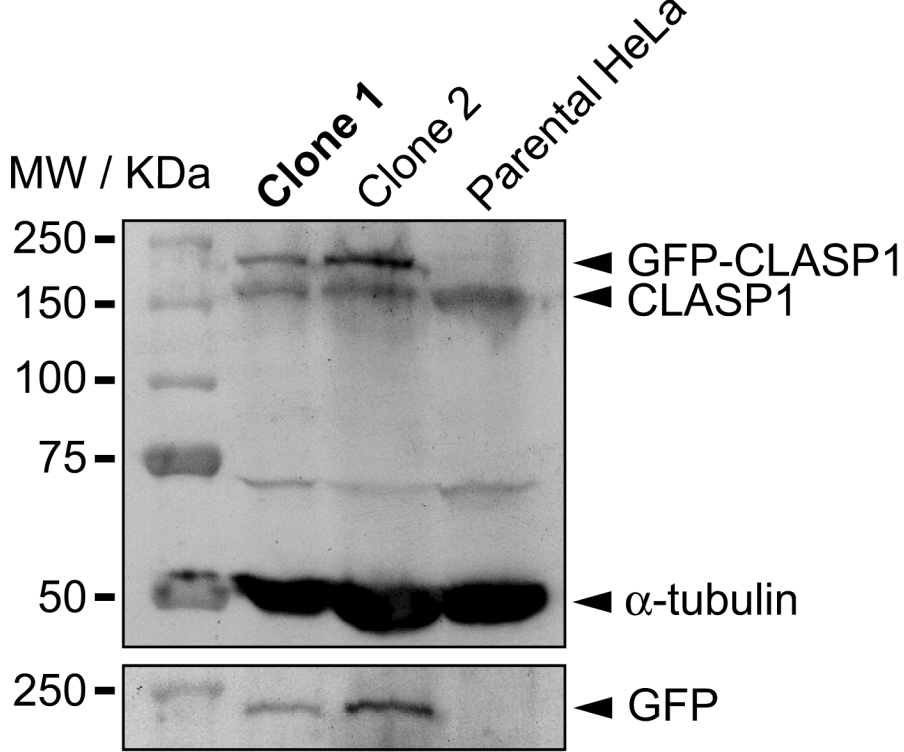

**Supplementary Figure S3 - Pereira et al., 2006**

Supplement: mbc_E06-07-0579_3.pdf [file mbc_E06-07-0579_3.pdf]

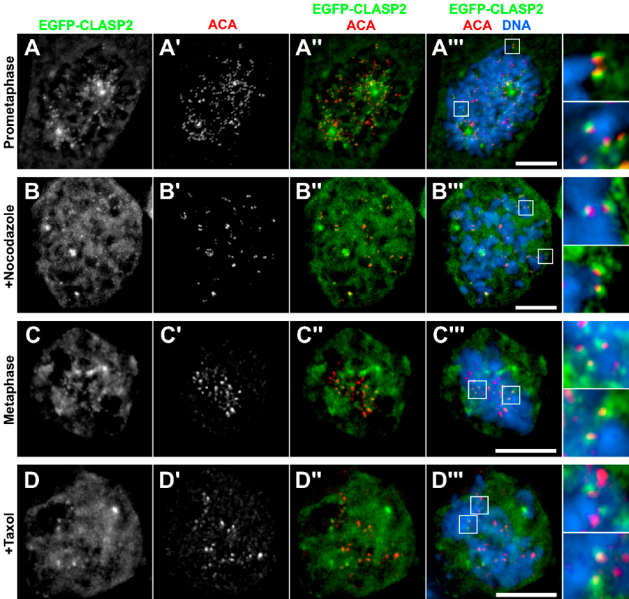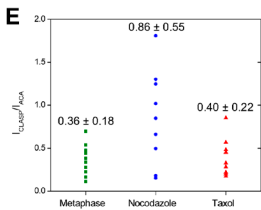

Supplement: mbc_E06-07-0579_4.pdf [file mbc_E06-07-0579_4.pdf]

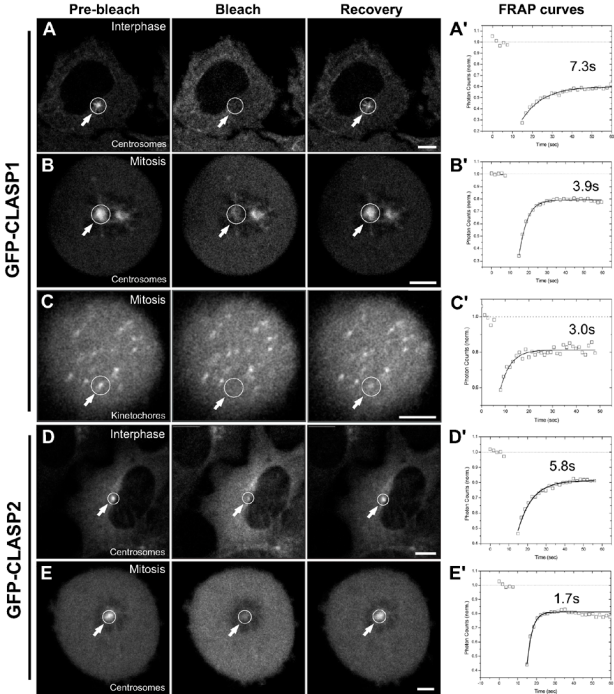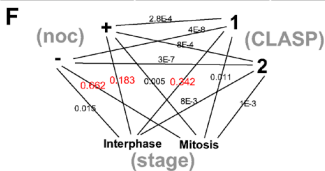

Supplementary Figure S5 - Pereira et al., 2006

Supplement: mbc_E06-07-0579_5.pdf [file mbc_E06-07-0579_5.pdf]

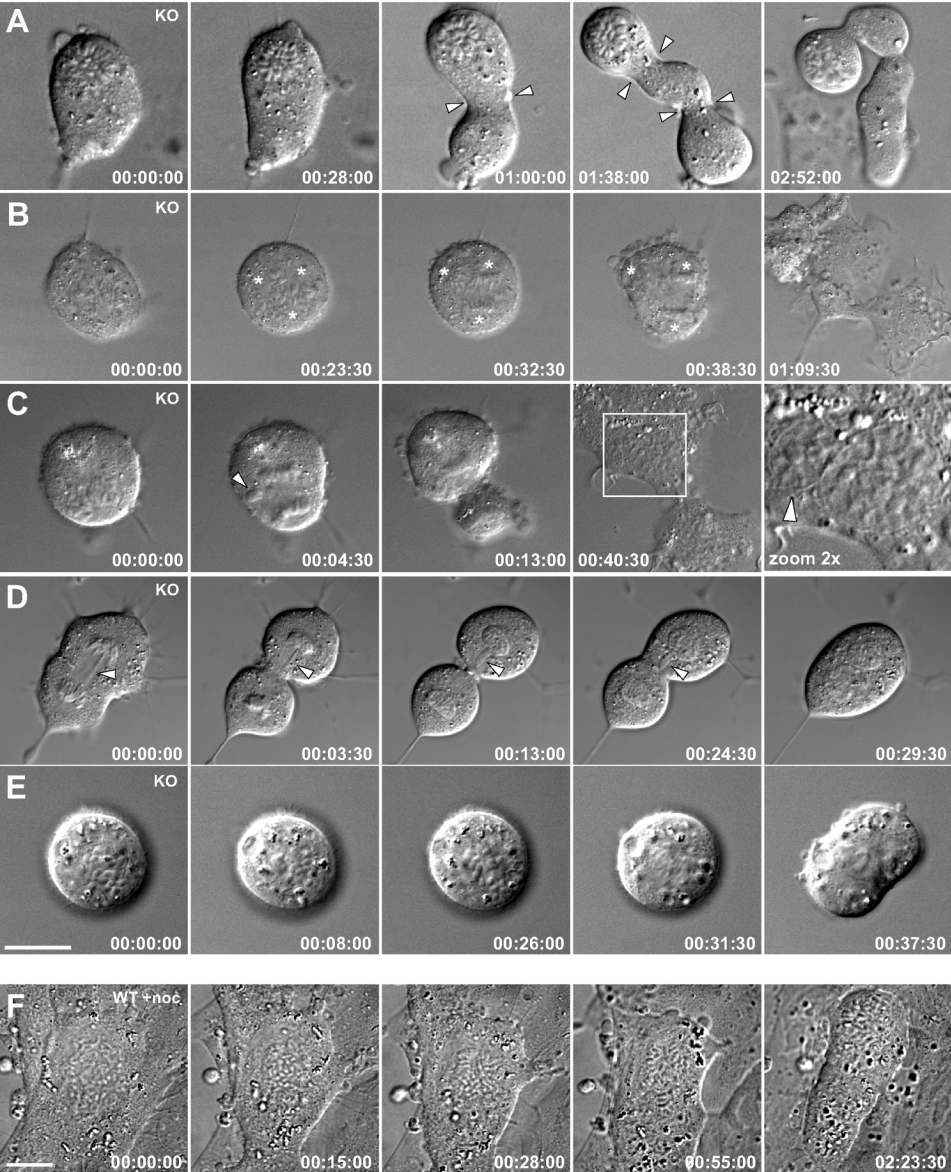

Supplementary Figure S6 - Pereira et al., 2006

Supplement: mbc_E06-07-0579_6.pdf [file mbc_E06-07-0579_6.pdf]
